- bacterial infections: Focus on the Toll-like receptors. *J Intern Med* 2007; 261:511–28
37. Bhan U, Lukacs NW, Osterholzer JJ, Newstead MW, Zeng X, Moore TA, McMillan TR, Krieg AM, Akira S, Standiford TJ: TLR9 is required for protective innate immunity in Gram-negative bacterial pneumonia: Role of dendritic cells. *J Immunol* 2007; 179:3937–46
  38. Albiger B, Dahlberg S, Sandgren A, Wartha F, Beiter K, Katsuragi H, Akira S, Normark S, Henriques-Normark B: Toll-like receptor 9 acts at an early stage in host defence against pneumococcal infection. *Cell Microbiol* 2007; 9:633–44
  39. Negishi H, Osawa T, Ogami K, Ouyang X, Sakaguchi S, Koshiba R, Yanai H, Seko Y, Shitara H, Bishop K, Yonekawa H, Tamura T, Kaisho T, Taya C, Taniguchi T, Honda K: A critical link between Toll-like receptor 3 and type II interferon signaling pathways in antiviral innate immunity. *Proc Natl Acad Sci U S A* 2008; 105:20446–51
  40. Hardarson HS, Baker JS, Yang Z, Purevjav E, Huang CH, Alexopoulou L, Li N, Flavell RA, Bowles NE, Vallejo JG: Toll-like receptor 3 is an essential component of the innate stress response in virus-induced cardiac injury. *Am J Physiol Heart Circ Physiol* 2007; 292:H251–8
  41. Riad A, Westermann D, Zietsch C, Savvatis K, Becher PM, Bereswill S, Heimesaat MM, Lettau O, Lassner D, Dörner A, Poller W, Busch M, Felix SB, Schultheiss HP, Tschöpe C: TRIF Is a Critical Survival Factor in Viral Cardiomyopathy. *J Immunol* 2011; 186:2561–70
  42. Echtenacher B, Freudenberg MA, Jack RS, Männel DN: Differences in innate defense mechanisms in endotoxemia and polymicrobial septic peritonitis. *Infect Immun* 2001; 69:7271–6
  43. Casey LC, Balk RA, Bone RC: Plasma cytokine and endotoxin levels correlate with survival in patients with the sepsis syndrome. *Ann Intern Med* 1993; 119:771–8
  44. Cohen J: The immunopathogenesis of sepsis. *Nature* 2002; 420:885–91
  45. Hotchkiss RS, Coopersmith CM, McDunn JE, Ferguson TA: The sepsis seesaw: Tilting toward immunosuppression. *Nat Med* 2009; 15:496–7

## ANESTHESIOLOGY REFLECTIONS

### *A Rural Scene* by Dennis Jackson

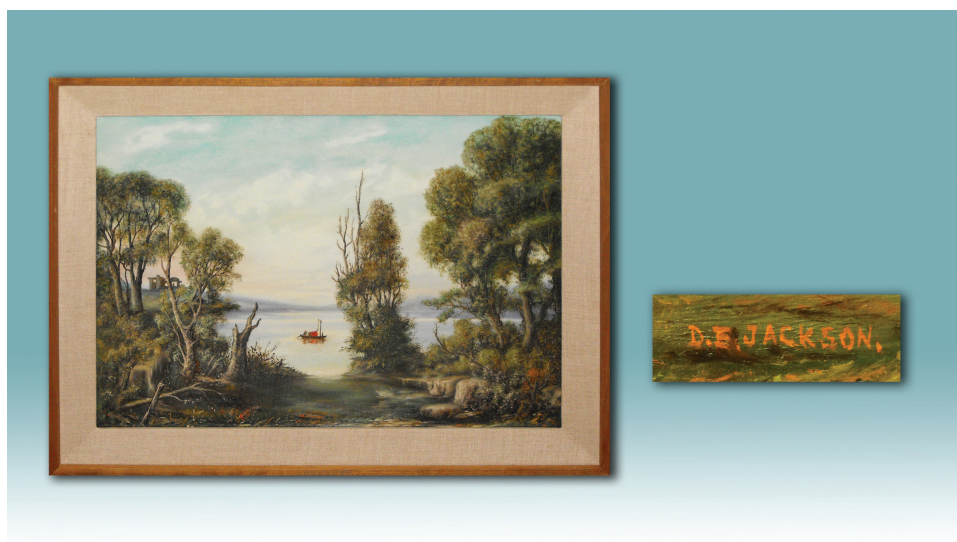

While corresponding with Librarian Walter Necker in 1964, pharmacologist and anesthesiologist Dennis E. Jackson suggested the possibility of painting a work of art for the Wood Library-Museum. The following year, Dr. William Dornette discussed delivering that painting to the WLM. *A Rural Scene* (left) is likely that very painting. Featuring two people aboard a small boat on a lake in the countryside, *A Rural Scene* is signed in the lower right hand corner by its artist. Jackson's signature (right) reflects the artistic side of this pioneer, who brought carbon dioxide absorption into mainstream anesthetic practice. (Copyright © the American Society of Anesthesiologists, Inc. This image also appears in the *Anesthesiology Reflections* online collection available at [www.anesthesiology.org](http://www.anesthesiology.org).)

George S. Bause, M.D., M.P.H., Honorary Curator, ASA's Wood Library-Museum of Anesthesiology, Park Ridge, Illinois, and Clinical Associate Professor, Case Western Reserve University, Cleveland, Ohio. [UJYC@aol.com](mailto:UJYC@aol.com).
